# Supplementary material for: The Toxicity of Eichhornia crassipes Fractionated Extracts against Aphis craccivora and Its Safety in Albino Rats
Source: MDPI journal article supplement (doi:10.3390/toxins14050327), 2022-05-04
Supplement: s1 [file s1]

**Table S1.** Minor phytochemicals of acetone fraction extract of *Eichhornia crassipes*.

| RT (min.) | Compound Name                                | RP Area (%) | MWt. | MF                                             |
|-----------|----------------------------------------------|-------------|------|------------------------------------------------|
| 23.51     | Dodecane                                     | 0.51        | 170  | C <sub>12</sub> H <sub>26</sub>                |
| 31.37     | 1,3,5-Triazine-2,4-diamine,6-chloro-N-ethyl- | 0.56        | 173  | C <sub>5</sub> H <sub>8</sub> ClN <sub>5</sub> |
| 33.04     | 3,7,11,15-Tetramethyl-2-hexadecen-1-ol       | 0.70        | 296  | C <sub>20</sub> H <sub>40</sub> O              |
| 33.24     | Pentadecanoic acid                           | 0.76        | 242  | C <sub>15</sub> H <sub>30</sub> O <sub>2</sub> |
| 34.03     | Pentadecanoic acid, 14-methyl-, methyl ester | 0.98        | 270  | C <sub>17</sub> H <sub>34</sub> O <sub>2</sub> |
| 37.86     | Octadecanoic acid, methyl ester              | 0.55        | 298  | C <sub>19</sub> H <sub>38</sub> O <sub>2</sub> |
| 42.39     | Hexanedioic acid, dioctyl ester              | 0.74        | 370  | C <sub>22</sub> H <sub>42</sub> O <sub>4</sub> |
| 48.86     | Phthalic acid, dinonyl ester                 | 0.86        | 418  | C <sub>26</sub> H <sub>42</sub> O <sub>4</sub> |
| 49.28     | 1,2-Benzenedicarboxylic acid,dinonyl ester   | 0.62        | 418  | C <sub>26</sub> H <sub>42</sub> O <sub>4</sub> |

RT: Retention time; RP area: Relative peak area; MWt: Molecular weight; MF: Molecular formula.

**Table S2.** Minor phytochemicals of ethanol fraction extract of *Eichhornia crassipes*.

| RT<br>(min.) | Compound Name                                                                   | RP Area<br>(%) | MWt. | MF                                                                |
|--------------|---------------------------------------------------------------------------------|----------------|------|-------------------------------------------------------------------|
| 15.75        | DL-Arabinose                                                                    | 0.19           | 150  | C <sub>5</sub> H <sub>10</sub> O <sub>5</sub>                     |
| 15.80        | 1,2,3-Propanetriol                                                              | 0.08           | 92   | C <sub>3</sub> H <sub>8</sub> O <sub>3</sub>                      |
| 15.86        | d-Mannose                                                                       | 0.18           | 180  | C <sub>6</sub> H <sub>12</sub> O <sub>6</sub>                     |
| 17.38        | 1,3,3-Trideuterio-endo-6-hydroxy-9-oxabicyclo (3.3.1) nonan 2-one               | 0.23           | 156  | C <sub>8</sub> H <sub>9</sub> D <sub>3</sub> O <sub>3</sub>       |
| 17.45        | trans-2-undecenoic acid                                                         | 0.35           | 184  | C <sub>11</sub> H <sub>20</sub> O <sub>2</sub>                    |
| 18.02        | 2(3H)-Furanone, 3-butyldihydro-                                                 | 0.66           | 142  | C <sub>8</sub> H <sub>14</sub> O <sub>2</sub>                     |
| 21.35        | Stearic acid,3 (octadecyloxy) propyl ester                                      | 0.09           | 594  | C <sub>39</sub> H <sub>78</sub> O <sub>3</sub>                    |
| 24.18        | 1-Tetradecanol                                                                  | 0.09           | 214  | C <sub>14</sub> H <sub>30</sub> O                                 |
| 25.25        | 2-tert-Butyl-4 isopropyl-5-meth ylphenol                                        | 0.58           | 206  | C <sub>14</sub> H <sub>22</sub> O                                 |
| 25.37        | Acrylothiamide,<br>2-(4-chlorophenyl)-3 (methoxy carbonylmethylamino)-N-benzyl- | 0.27           | 374  | C <sub>19</sub> H <sub>19</sub> ClN <sub>2</sub> O <sub>2</sub> S |
| 28.96        | 1H Cyclopropa[3,4] benz[1,2-e] azulene 4a,5,7b,9,9a(1aH)-pentol,                | 0.08           | 534  | C <sub>28</sub> H <sub>38</sub> O <sub>10</sub>                   |
| 29.07        | Benzene, 1,4-didecyl-                                                           | 0.09           | 358  | C <sub>26</sub> H <sub>46</sub>                                   |

|       |                                                 |      |     |                                                |
|-------|-------------------------------------------------|------|-----|------------------------------------------------|
| 29.20 | 11-Benzylheneicosane                            | 0.14 | 386 | C <sub>28</sub> H <sub>50</sub>                |
| 32.64 | Tridecanoic acid, 13-formyl-, ethyl ester       | 0.29 | 270 | C <sub>16</sub> H <sub>30</sub> O <sub>3</sub> |
| 33.03 | Isopropyl linoleate                             | 0.14 | 322 | C <sub>21</sub> H <sub>38</sub> O <sub>2</sub> |
| 33.26 | Pentadecanoic acid                              | 0.20 | 242 | C <sub>15</sub> H <sub>30</sub> O <sub>2</sub> |
| 33.39 | Ethyl 14-oxotetradecanoate                      | 0.32 | 270 | C <sub>16</sub> H <sub>30</sub> O <sub>3</sub> |
| 34.82 | 1,2-Benzenedicarboxylic acid, butyl octyl ester | 0.40 | 334 | C <sub>20</sub> H <sub>30</sub> O <sub>4</sub> |
| 34.93 | Ethyl 9-hexadecenoate                           | 0.38 | 282 | C <sub>18</sub> H <sub>34</sub> O <sub>2</sub> |
| 35.13 | 9-Hexadecenoic acid, eicosyl ester, (Z)-        | 0.19 | 534 | C <sub>36</sub> H <sub>70</sub> O <sub>2</sub> |
| 36.95 | 6,9,12-Octadecatrienoic acid, methyl ester      | 0.12 | 292 | C <sub>19</sub> H <sub>32</sub> O <sub>2</sub> |
| 37.26 | Methyl linoleate                                | 0.97 | 294 | C <sub>19</sub> H <sub>34</sub> O <sub>2</sub> |
| 37.49 | Methyl trans-8 octadecenoate                    | 0.34 | 296 | C <sub>19</sub> H <sub>36</sub> O <sub>2</sub> |
| 37.85 | Methyl stearate                                 | 0.76 | 298 | C <sub>19</sub> H <sub>38</sub> O <sub>2</sub> |

|       |                                                    |      |     |                                                 |
|-------|----------------------------------------------------|------|-----|-------------------------------------------------|
| 38.92 | Octadecanoic acid,<br>2,3-dihydroxypropyl ester    | 0.71 | 358 | C <sub>21</sub> H <sub>42</sub> O <sub>4</sub>  |
| 39.04 | Octadecanoic acid, ethyl ester                     | 0.59 | 312 | C <sub>20</sub> H <sub>40</sub> O <sub>2</sub>  |
| 42.42 | Lucenin 2                                          | 0.10 | 610 | C <sub>27</sub> H <sub>30</sub> O <sub>16</sub> |
| 46.35 | 4-O-Methylphorbol<br>12,13-didecanoate             | 0.31 | 686 | C <sub>41</sub> H <sub>66</sub> O <sub>8</sub>  |
| 46.49 | 3-Hydroxyspirost-8-en-11-one                       | 0.10 | 428 | C <sub>27</sub> H <sub>40</sub> O <sub>4</sub>  |
| 46.60 | Propane, 1,3-bis(octadecyloxy)-                    | 0.18 | 580 | C <sub>39</sub> H <sub>80</sub> O <sub>2</sub>  |
| 46.71 | Dodecyl 8-(3-octyl-2-oxiranyl) octanoate           | 0.72 | 299 | C <sub>16</sub> H <sub>13</sub> NO <sub>5</sub> |
| 46.83 | Dodecyl cis-9,10-epoxyoctadecanoate                | 0.62 | 466 | C <sub>30</sub> H <sub>58</sub> O <sub>3</sub>  |
| 46.98 | 1,3-dioctadecyloxy-propane                         | 0.16 | 580 | C <sub>39</sub> H <sub>80</sub> O <sub>2</sub>  |
| 47.31 | Dodecyl 8-(3-octyl-2-oxiranyl) octanoate           | 0.28 | 466 | C <sub>30</sub> H <sub>58</sub> O <sub>3</sub>  |
| 47.65 | 1,2-Cyclohexanedicarboxylic<br>acid, dinonyl ester | 0.35 | 424 | C <sub>26</sub> H <sub>48</sub> O <sub>4</sub>  |
| 48.01 | Propane, 1,3-bis (octadecyloxy)-                   | 0.40 | 580 | C <sub>39</sub> H <sub>80</sub> O <sub>2</sub>  |

|       |                                                               |      |     |                                                 |
|-------|---------------------------------------------------------------|------|-----|-------------------------------------------------|
| 48.14 | 1,2-Cyclohexanedicarboxylic<br>acid, 2-ethylhexyl nonyl ester | 0.98 | 410 | C <sub>25</sub> H <sub>46</sub> O <sub>4</sub>  |
| 48.27 | 1,2-Cyclohexanedicarboxylic<br>acid, dinonyl ester            | 0.78 | 424 | C <sub>26</sub> H <sub>48</sub> O <sub>4</sub>  |
| 48.55 | Octadecane,<br>1,1'- [1,3 propanediylbis(oxy)] b<br>is- (CAS) | 0.78 | 580 | C <sub>39</sub> H <sub>80</sub> O <sub>2</sub>  |
| 48.70 | Octadecane,<br>1,1'-[1,3-propanediylbis(oxy)] b<br>is-        | 0.33 | 580 | C <sub>39</sub> H <sub>80</sub> O <sub>2</sub>  |
| 48.96 | 2-[Hydroxy(4'-nitrophenyl) methyl]-11-phenoxyprop-2-en-1-one  | 0.35 | 299 | C <sub>16</sub> H <sub>13</sub> NO <sub>5</sub> |

---

RT: Retention time; RP area: Relative peak area; MWt: Molecular weight; MF: Molecular formula.
